# Supplementary material
Source: PubMed Central journal article supplement (PMC3080459)
Supplement: NIHMS273556-supplement-Supplemental_Data.pdf [file NIHMS273556-supplement-Supplemental_Data.pdf]

## **Supplemental Material**

Kurnik D et al. Genetic variations in the  $\alpha_{2A}$ -adrenoreceptor are associated with blood pressure response to the agonist dexmedetomidine.

| SNP position in haplotype | Chromosome position | rs number  | Nucleotide change | MAF (%)        |                |
|---------------------------|---------------------|------------|-------------------|----------------|----------------|
|                           |                     |            |                   | White subjects | Black subjects |
| 1                         | 112835159           | rs11195418 | A>G               | 10.0           | 0.0            |
| 2                         | 112836503           | rs1800544  | C>G               | 31.1           | 62.5           |
| 3                         | 112837073           | rs2484516  | C>G               | 0.0            | 8.3            |
| 4                         | 112837538           | rs1800545  | G>A               | 14.9           | 31.9           |
| 5                         | 112838552           | rs1800035  | C>G               | 0.0            | 8.3            |
| 6                         | 112838892           | rs1800038  | C>A               | 0.0            | 4.2            |
| 7                         | 112839282           | rs34303217 | T>A               | 0.0            | 5.6            |
| 8                         | 112839579           | rs553668   | A>G               | 14.9           | 19.4           |
| 9                         | 112839601           | rs3750625  | C>A               | 7.4            | 19.4           |

**Table S1: Minor allele frequencies of 9 ADRA2A tagSNPs in white and black subjects.** Chromosome positions refer to Genome build GRCh 37.1., August 2009.

SNP=single nucleotide polymorphism; MAF=minor allele frequency.

| Haplotype family | SNP positions in haplotype                                                                                                                      | Haplotype frequency (%) |                |
|------------------|-------------------------------------------------------------------------------------------------------------------------------------------------|-------------------------|----------------|
|                  | 1-2-3-4-5-6-7-8-9                                                                                                                               | White subjects          | Black subjects |
| 1                | A-C-C-G-C-C-T-G-C                                                                                                                               | 71.4                    | 29.2           |
| 2                | A-C-C-G-G-C-T-G-C                                                                                                                               | 0.0                     | 8.3            |
| 3                | A-G-C-G-C-C-T-G-C                                                                                                                               | 1.4                     | 11.1           |
| 4                | A-G-C-G-C-C-T-A-C<br>A-G-G-G-C-C-T-A-C<br>A-G-C-G-C-C-A-A-C<br>A-G-C-G-C-A-T-A-C<br>A-G-G-G-C-C-A-A-C<br>A-G-G-G-C-C-A-A-C<br>A-G-C-G-G-A-T-A-C | 14.9                    | 19.4           |
| 5                | A-G-C-A-C-C-T-G-C<br>A-G-C-A-C-C-T-G-A<br>G-G-C-A-C-C-T-G-C<br>A-G-C-A-G-C-T-G-C<br>G-G-C-A-C-C-T-G-A                                           | 15.7                    | 31.9           |

**Table S2. Definition and distribution of haplotype families.** Minor alleles are shadowed in grey. Haplotypes were grouped in haplotypes families as previously defined.<sup>1</sup>

|              | $\Delta AUC_{SBP}$<br>mmHg*hr                       | $\Delta AUC_{DBP}$<br>mmHg*hr                         | $\Delta AUC_{HR}$<br>bpm*hr                               |
|--------------|-----------------------------------------------------|-------------------------------------------------------|-----------------------------------------------------------|
| HT 2         | 3.7 (-1.6 to 8.9)<br>P=0.16                         | 1.0 (-3.4 to 5.4)<br>P=0.65                           | -0.9 (-5.9 to 4.2)<br>P=0.73                              |
| HT 3 carrier | -6.1 (-10.8 to -1.3)<br>P=0.013                     | -3.8 (-7.7 to 0.0)<br>P=0.052                         | -3.7 (-8.2 to 0.9)<br>P=0.11                              |
| HT4          | 2.9 (0.0-5.8)<br>P=0.047<br>P <sub>rec</sub> =0.007 | 0.9 (-1.5 to 3.2)<br>P=0.47<br>P <sub>rec</sub> =0.10 | -0.5 (-3.3 to 2.4)<br>P=0.75 ,<br>P <sub>rec</sub> =0.069 |
| HT 5         | -1.1 (-3.7 to 1.6)<br>P=0.43                        | -0.3 (-2.5 to 1.9)<br>P=0.80                          | -0.1 (-2.7 to 2.5)<br>P=0.93                              |

**Table S3. Effect of all haplotypes combined on decrease in blood pressure and heart rate.** The table shows means and 95% CI of the  $\beta$ -coefficients. P-values are adjusted for all other haplotypes, age, sex, race, BMI,  $AUC_{Plac}$  of the respective outcome, and dexmedetomidine plasma concentrations. P<sub>rec</sub> denotes P-values derived from analyses in which HT4 was treated as a recessive (rather than additive) trait.

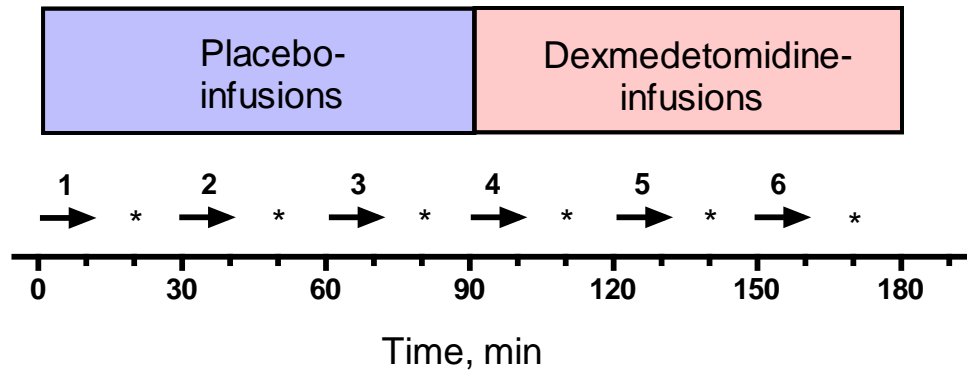

**Figure S1. Diagram of study protocol.** After baseline measurements, subjects received 6 infusions (10 minutes each, indicated by horizontal arrows). Ten minutes after completion of the infusions, blood pressure was determined and a blood sample taken (indicated by asterix). The first three infusions were placebo, the last three were dexmedetomidine infusions at doses of 0.1, 0.15, and 0.15 mcg/kg body weight, respectively.

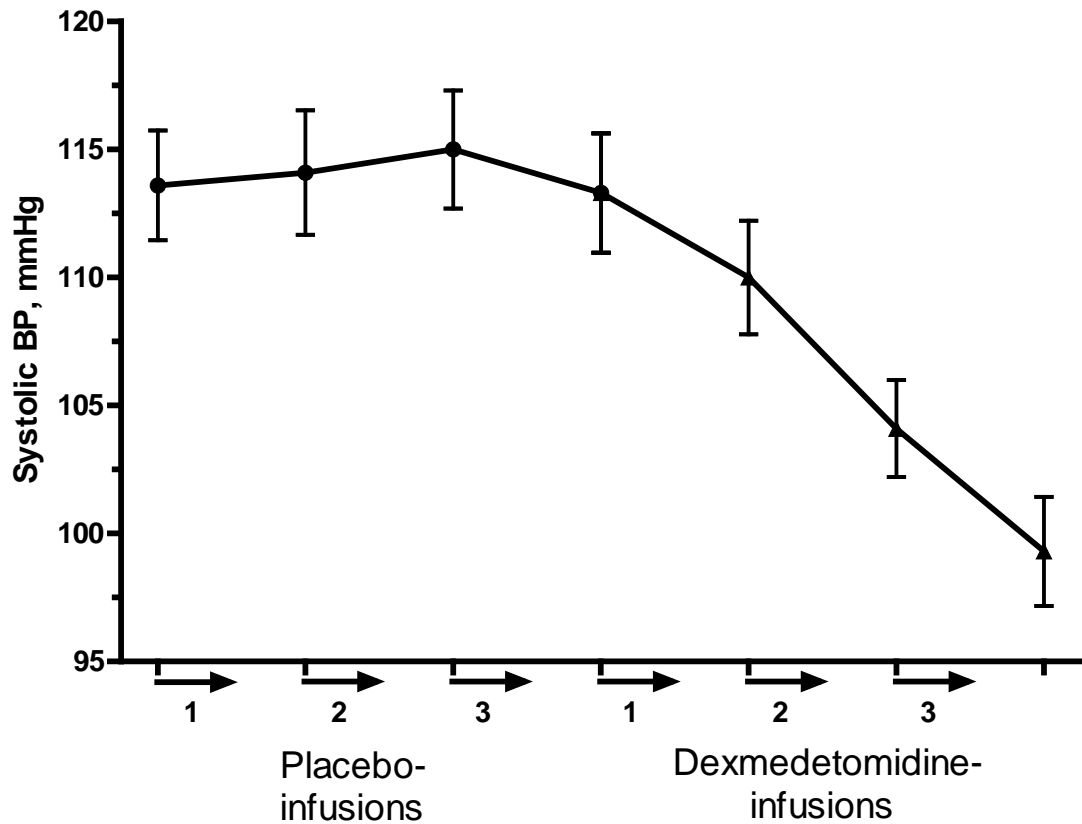

**Figure S2. Systolic blood pressure during placebo and dexmedetomidine infusion in 73 subjects.** Data points represent the mean, error bars the 95% confidence intervals of systolic blood pressure measured 10 minutes after completion of each infusion (represented by horizontal arrows). The blue and red areas represent the  $AUC_{SBP}$  during placebo and dexmedetomidine, respectively.

### Supplement reference

1. Kurnik D, Muszkat M, Li C, Sofowora GG, Solus J, Xie HG, Harris PA, Jiang L, McMunn C, Ihrie P, Dawson EP, Williams SM, Wood AJ, Stein CM. Variations in the alpha2A-adrenergic receptor gene and their functional effects. *Clin Pharmacol Ther* 2006; 79:173-85.
